# Supplementary material for: Thermodynamic and structural features of chlorodifluoromethane (a sI–sII dual hydrate former) + external guest (N2 or CH4) hydrates and their significance for greenhouse gas separation
Source: Royal Society of Chemistry journal article supplement (doi:10.1039/d1cp02327f), 2021-01-01
Supplement: d1cp02327f1.pdf [file d1cp02327f1.pdf]

**Supporting Information**

**Thermodynamic and structural features of chlorodifluoromethane (a SI-sII  
dual hydrate former) + external guest (N<sub>2</sub> or CH<sub>4</sub>) hydrates and their  
significance for greenhouse gas separation**

Junghoon Mok<sup>a</sup>, Junkyu Lim<sup>a</sup>, Wonjung Choi<sup>a</sup>, Soyeong Yun<sup>a</sup>, Joonseop Lee<sup>a</sup>, Gyeol Ko<sup>a</sup>,  
Yongwon Seo<sup>a,\*</sup>

*<sup>a</sup>Department of Urban and Environmental Engineering, Ulsan National Institute of Science and  
Technology, Ulsan 44919, Republic of Korea*

---

\* Corresponding author. Tel: +82-52-217-2821. Fax: +82-52-217-2859  
E-mail address: [ywseo@unist.ac.kr](mailto:ywseo@unist.ac.kr) (Y. Seo)

**Table S1.** Atomic coordinates and site occupancies for CHClF<sub>2</sub> hydrate at 133 K. Space group:  $Pm\bar{3}n$ , Lattice parameter:  $a = 11.9268(6)$  Å ( $R_{wp} = 12.3$  % and  $\chi^2 = 24.8$ ) (background subtracted)

| Atom              | x          | y          | z         | B (Å <sup>2</sup> ) | g         |
|-------------------|------------|------------|-----------|---------------------|-----------|
| O1                | 0.1844(2)  | 0.1844     | 0.1844    | 1.025(2)            | 1         |
| O2                | 0          | 0.3082(3)  | 0.1158(3) | 2.520(1)            | 1         |
| O3                | 0          | 0.5        | 0.25      | 2.156(3)            | 1         |
| H1                | 0.2317(3)  | 0.2317(3)  | 0.2317(3) | 1.537(2)            | 0.5       |
| H2                | 0          | 0.438(3)   | 0.191(3)  | 3.234(4)            | 0.5       |
| H3                | 0          | 0.388(4)   | 0.151(5)  | 3.781(2)            | 0.5       |
| H4                | 0          | 0.327(2)   | 0.0321(6) | 3.781               | 0.5       |
| H5                | 0.0535(19) | 0.2484(14) | 0.146(4)  | 3.781               | 0.5       |
| H6                | 0.105(3)   | 0.234(3)   | 0.176(3)  | 1.537(2)            | 0.5       |
| C <sub>L</sub> 1  | 0.24958    | 0.49168    | 0.02334   | 0.289(2)            | 0.1247(5) |
| F <sub>L</sub> 1  | 0.19174    | 0.57577    | 0.07071   | 0.289               | 0.1247    |
| F <sub>L</sub> 2  | 0.20538    | 0.39387    | 0.05711   | 0.289               | 0.1247    |
| Cl <sub>L</sub> 1 | 0.23936    | 0.50211    | -0.1265   | 0.289               | 0.1247    |
| H <sub>L</sub> 1  | 0.33779    | 0.49654    | 0.04686   | 0.433(4)            | 0.1247    |

**Table S2.** Atomic coordinates and site occupancies for CHClF<sub>2</sub> (5%) + N<sub>2</sub> (95%) hydrate at 133 K. Space group:  $Fd\bar{3}m$ , Lattice parameter:  $a = 17.0843(5)$  Å ( $R_{wp} = 10.1\%$  and  $\chi^2 = 13.1$ ) (background subtracted)

| Atom              | x         | y        | z          | B (Å <sup>2</sup> ) | g         |
|-------------------|-----------|----------|------------|---------------------|-----------|
| O1                | 0.125     | 0.125    | 0.125      | 0.584(4)            | 1         |
| O2                | 0.2175(2) | 0.2175   | 0.2175     | 1.328(2)            | 1         |
| O3                | 0.1823(2) | 0.1823   | 0.3709(2)  | 0.226(2)            | 1         |
| H1                | 0.1841(2) | 0.1841   | 0.1841     | 1.993(4)            | 0.5       |
| H2                | 0.1584(2) | 0.1584   | 0.1584     | 0.877(6)            | 0.5       |
| H3                | 0.208(3)  | 0.208    | 0.2742(12) | 1.993               | 0.5       |
| H4                | 0.198(2)  | 0.198    | 0.3168(13) | 0.338(2)            | 0.5       |
| H5                | 0.1407(3) | 0.1407   | 0.375(4)   | 0.338               | 0.5       |
| H6                | 0.233(5)  | 0.165(6) | 0.395(5)   | 0.338               | 0.5       |
| N <sub>S</sub> 1  | 0.9863    | 0.01166  | 0.02777    | 0.485               | 0.0595(5) |
| N <sub>S</sub> 2  | 0.01367   | 0.9883   | 0.9722     | 0.485               | 0.0595    |
| C <sub>L</sub> 1  | 0.34566   | 0.37748  | 0.41507    | 3.933(6)            | 0.0385(4) |
| F <sub>L</sub> 1  | 0.31099   | 0.44067  | 0.38384    | 3.933               | 0.0385    |
| F <sub>L</sub> 2  | 0.31345   | 0.313    | 0.38385    | 3.933               | 0.0385    |
| Cl <sub>L</sub> 1 | 0.44838   | 0.37945  | 0.39291    | 3.933               | 0.0385    |
| H <sub>L</sub> 1  | 0.33859   | 0.37735  | 0.47851    | 5.899               | 0.0385    |
| N <sub>L</sub> 1  | 0.38282   | 0.3956   | 0.39966    | 0.0001              | 0.0032(4) |
| N <sub>L</sub> 2  | 0.36718   | 0.3544   | 0.35034    | 0.0001              | 0.0032    |

\*The position of the N<sub>2</sub> molecules was fixed at the center of the hydrate cages during the refinement.

**Table S3.** Atomic coordinates and site occupancies for  $\text{CHClF}_2$  (5%) +  $\text{CH}_4$  (95%) hydrate at 133 K. Space group:  $Fd\bar{3}m$ , Lattice parameter:  $a = 17.1232(2)$  Å ( $R_{wp} = 9.72\%$  and  $\chi^2 = 12.5$ ) (background subtracted)

| Atom              | x          | y        | z          | B (Å <sup>2</sup> ) | g       |
|-------------------|------------|----------|------------|---------------------|---------|
| O1                | 0.125      | 0.125    | 0.125      | 0.310(4)            | 1       |
| O2                | 0.2168(2)  | 0.2168   | 0.2168     | 0.470(2)            | 1       |
| O3                | 0.1824(16) | 0.1824   | 0.3704(2)  | 1.651(2)            | 1       |
| H1                | 0.1837(2)  | 0.1837   | 0.1837     | 0.705(4)            | 0.5     |
| H2                | 0.1581(2)  | 0.1581   | 0.1581     | 0.465(6)            | 0.5     |
| H3                | 0.205(4)   | 0.205    | 0.2724(19) | 0.705               | 0.5     |
| H4                | 0.193(6)   | 0.193    | 0.314(3)   | 2.477(3)            | 0.5     |
| H5                | 0.1407(3)  | 0.1407   | 0.373(5)   | 2.477               | 0.5     |
| H6                | 0.245(3)   | 0.153(2) | 0.379(4)   | 2.477               | 0.5     |
| C <sub>S</sub> 1  | 0          | 0        | 0          | 0.481               | 0.851   |
| H <sub>S</sub> 1  | 0.01212    | 0.01486  | 0.9393     | 0.722               | 0.07092 |
| H <sub>S</sub> 2  | 0.9905     | 0.9373   | 0.00498    | 0.722               | 0.07092 |
| H <sub>S</sub> 3  | 0.9479     | 0.03097  | 0.01943    | 0.722               | 0.07092 |
| H <sub>S</sub> 4  | 0.04949    | 0.01689  | 0.03627    | 0.722               | 0.07092 |
| C <sub>L</sub> 1  | 0.34883    | 0.36139  | 0.35135    | 5.696               | 0.02394 |
| F <sub>L</sub> 1  | 0.39436    | 0.41311  | 0.31399    | 5.696               | 0.02394 |
| F <sub>L</sub> 2  | 0.36739    | 0.28927  | 0.32695    | 5.696               | 0.02394 |
| Cl <sub>L</sub> 1 | 0.36543    | 0.36859  | 0.45465    | 5.696               | 0.02394 |
| H <sub>L</sub> 1  | 0.2874     | 0.37357  | 0.33982    | 8.543               | 0.02394 |
| C <sub>L</sub> 1  | 0.375      | 0.375    | 0.405      | 4.274               | 0.07092 |
| H <sub>L</sub> 1  | 0.42315    | 0.40171  | 0.4369     | 6.411               | 0.01773 |
| H <sub>L</sub> 2  | 0.33511    | 0.34728  | 0.44611    | 6.411               | 0.01773 |

|                  |         |         |         |       |         |
|------------------|---------|---------|---------|-------|---------|
| H <sub>L</sub> 3 | 0.39784 | 0.33125 | 0.36483 | 6.411 | 0.01773 |
| H <sub>L</sub> 4 | 0.3439  | 0.41976 | 0.37216 | 6.411 | 0.01773 |

\*The position of the CH<sub>4</sub> molecules in the small (5<sup>12</sup>) cages was fixed at the center of the hydrate cages during the refinement.

**Table S4.** Phase fractions of hydrate and hexagonal ice in the hydrate samples

|                                                   | Fraction of hydrate (wt%) | Fraction of hexagonal ice (wt%) |
|---------------------------------------------------|---------------------------|---------------------------------|
| <b>CHClF<sub>2</sub> hydrate</b>                  | 95.2                      | 4.8                             |
| <b>CHClF<sub>2</sub> + N<sub>2</sub> hydrate</b>  | 51.8                      | 48.2                            |
| <b>CHClF<sub>2</sub> + CH<sub>4</sub> hydrate</b> | 46.8                      | 53.2                            |

\*The higher ice fraction in the binary hydrates was attributable to the smaller driving force for binary hydrate formation.

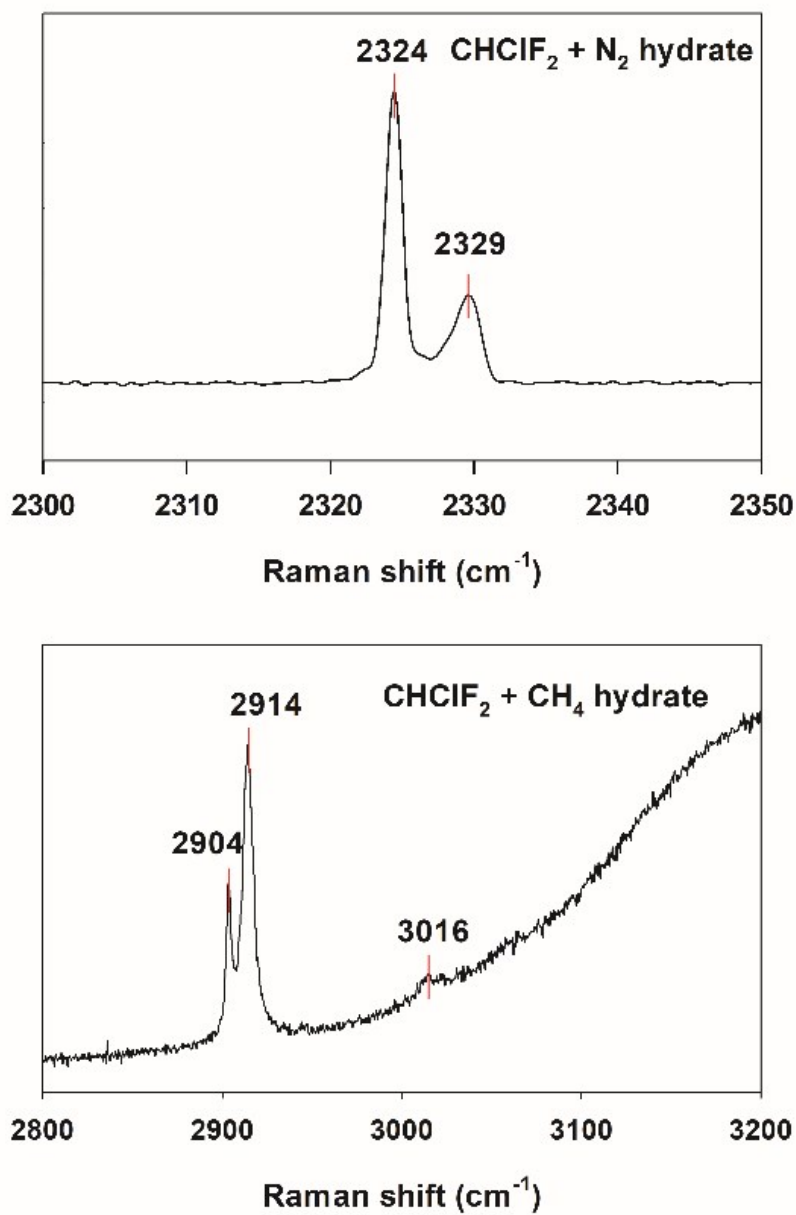

**Fig. S1.** *In situ* Raman spectra of binary CHClF<sub>2</sub> (5%) + N<sub>2</sub> (95%) hydrate (2300 – 2350 cm<sup>-1</sup>) and binary CHClF<sub>2</sub> (5%) + CH<sub>4</sub> (95%) hydrate (2800 – 3200 cm<sup>-1</sup>). The peak at 2329 cm<sup>-1</sup> originated from residual air in the Raman probe.
